# Supplementary material for: Pulmonary alveolar proteinosis treatment by whole-lung lavage
Source: HighWire-hosted journal article supplement (doi:10.1136/postgradmedj-2011-130620), 2012-04-29
Supplement: WLL_Records.pdf [file WLL_Records.pdf]

# WLL Records

By Dr. CAI Chang

2011 11 19

大剂量支气管肺泡灌洗的手术前准备注意事项

| 时间       | 血压    | HR | R | SPO <sub>2</sub> | 次数 | 入量     | 出量     | 潮气量 | 平台量          |
|----------|-------|----|---|------------------|----|--------|--------|-----|--------------|
| 14:45    | 91/58 | 52 |   | 97               |    | 1000ml | 700ml  |     | 300ml        |
| 14:50    |       |    |   |                  |    |        |        |     |              |
| 14:57    |       | 64 |   | 94               | 1  | 1000ml | 700ml  |     | +300ml (300) |
| 15:07    | 75/64 | 73 |   | 88               | 2  | 1000ml | 970ml  |     | +30ml        |
| 15:11:49 |       | 66 |   | 88               | 3  | 1000ml | 1090ml |     | -90ml        |
| 15:17:53 |       | 66 |   | 89               | 4  | 1000ml | 1060ml |     | -40ml        |
| 15:23:07 |       | 64 |   | 89               | 5  | 1000ml | 1060ml |     | -60ml        |
| 15:28:30 |       | 63 |   | 89               | 6  | 1000ml | 1000ml |     | 0            |
| 15:33:02 |       | 64 |   | 89               | 7  | 1000ml | 1070ml |     | -70ml        |
| 15:39:00 |       | 61 |   | 90               | 8  | 1000ml | 1070ml |     | -30ml        |

|          |  |    |  |    |    |        |        |  |        |
|----------|--|----|--|----|----|--------|--------|--|--------|
| 15:46:10 |  | 59 |  | 90 | 9  | 1000ml | 990ml  |  | +10ml  |
| 15:50:49 |  | 60 |  | 90 | 10 | 1000ml | 1060ml |  | +60ml  |
| 15:56:50 |  | 86 |  | 91 | 11 | 1000ml | 1020ml |  | -20ml  |
| 16:00:00 |  | 69 |  | 90 | 12 | 1000ml | 1120ml |  | -120ml |

TIME BP HR R SPO<sub>2</sub> R Input Output Retention

16:04 = 28 左侧吸引 双侧肺泡灌洗 SPO<sub>2</sub> 98%

-460 + 340  
150ml

大剂量支气管肺泡灌洗的手术记录单

| 时间    | BP     | HR | R  | SPO <sub>2</sub> | 次数 | 入量                    | 出量     | 滞留量       |
|-------|--------|----|----|------------------|----|-----------------------|--------|-----------|
| 12:19 | 98/67  | 73 | 13 | 97               | 1  | 1000 <sup>12:24</sup> | 680    | 320       |
| 12:26 | 86/56  | 76 | 15 | 94               | 2  | 1000 <sup>12:28</sup> | 990    | 10        |
| 12:30 | 81/52  | 79 | 34 | 95               | 3  | 1000 <sup>12:33</sup> | 1000   | 0         |
| 12:35 | 87/55  | 76 | 29 | 96               | 4  | 1000 <sup>12:37</sup> | 1030   | -30       |
| 12:40 | 80/52  | 74 | 13 | 96               | 5  | 1000 <sup>12:42</sup> | 1000   | 0         |
| 12:44 | 71/51  | 77 | 13 | 96               | 6  | 1000 <sup>12:46</sup> | 960    | 40        |
| 12:48 | 79/51  | 72 | 16 | 97               | 7  | 1000 <sup>12:50</sup> | 1050   | -50       |
| 12:52 | 99/69  | 89 | 21 | 96               | 8  | 1000 <sup>12:54</sup> | 1000   | 0         |
| 12:55 | 106/71 | 90 | 16 | 96               | 9  | 1000 <sup>12:57</sup> | 1030   | -30       |
| 13:00 | 77/52  | 82 | 13 | 97               | 10 | 1000 <sup>13:02</sup> | 1030   | -30       |
| 13:05 | 88/57  | 75 | 37 | 98               | 11 | 1000 <sup>13:07</sup> | 800    | 200       |
| 13:12 | 88/59  | 67 | 14 | 99               | 12 | 1000 <sup>13:14</sup> | 1060   | -60       |
| 13:17 | 90/60  | 71 | 13 | 99               | 13 | 1000 <sup>13:19</sup> | 1000   | 0         |
| 13:20 | 90/57  | 73 | 26 | 100              | 14 | 1000 <sup>13:22</sup> | 1100   | -100      |
| 13:25 | 82/53  | 72 | 14 | 99               | 15 | 700 <sup>13:26</sup>  | 800    | -100      |
| TIME  | BP     | HR | R  | SPO <sub>2</sub> | SN | INPUT                 | OUTPUT | RETENTION |

2011.8.5
